# Supplementary material for: Greedy de novo motif discovery to construct motif repositories for bacterial proteomes
Source: Springer Nature journal article supplement (doi:10.1186/s12859-019-2686-8), 2019-04-01

Motif

Logo

m01

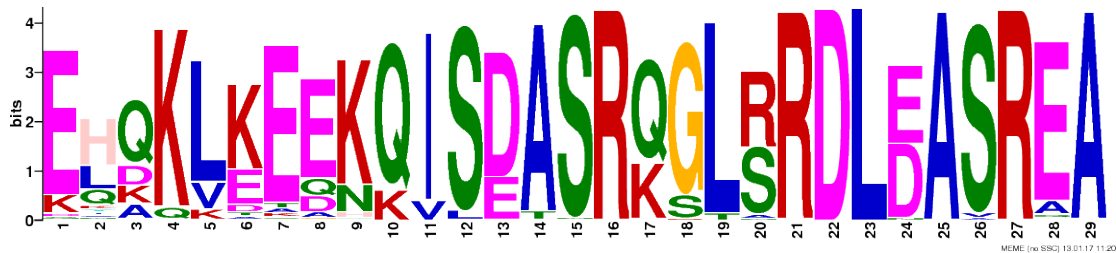

m02

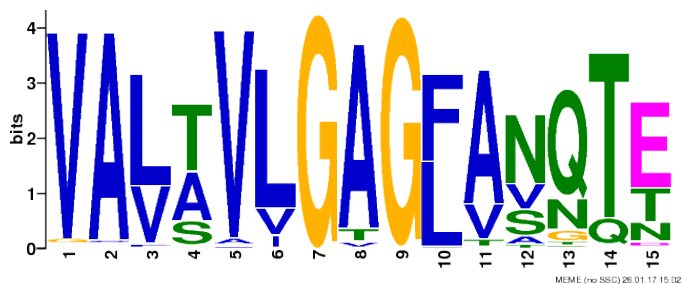

m03

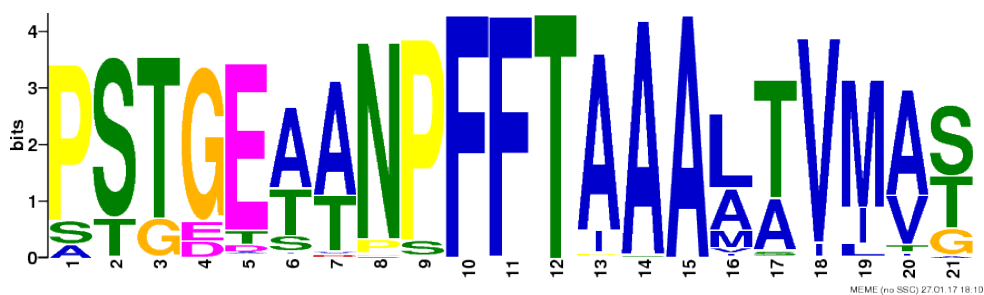

m04

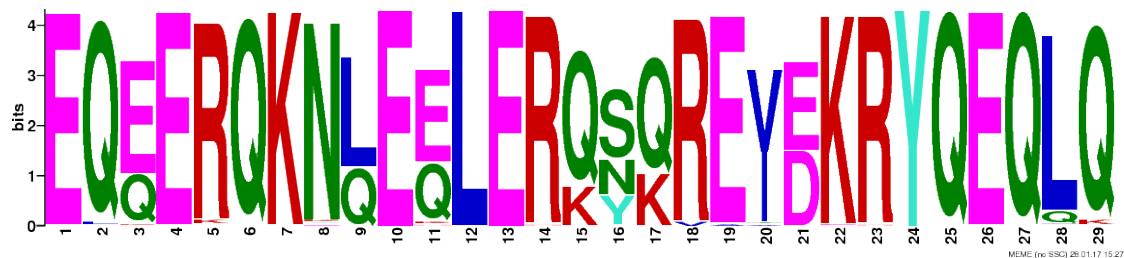

m05

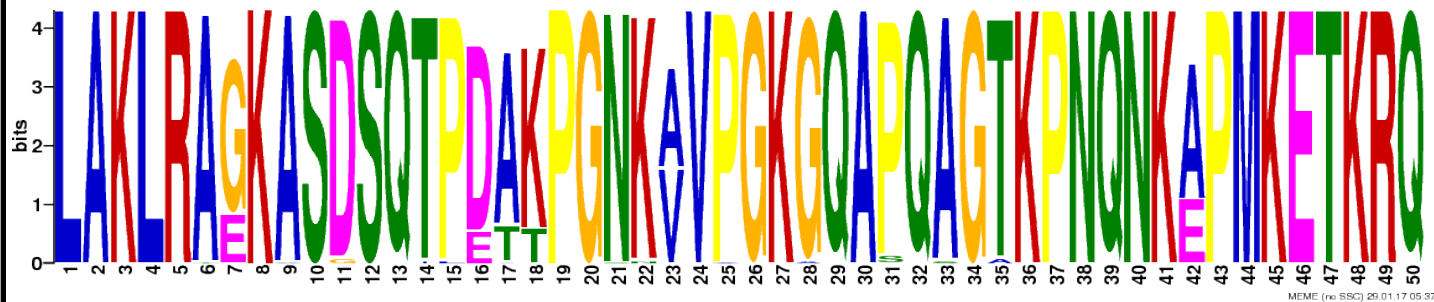

m06

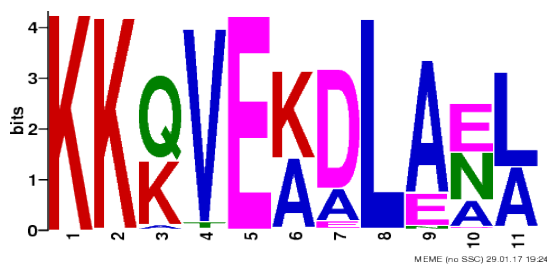

Motif

Logo

m07

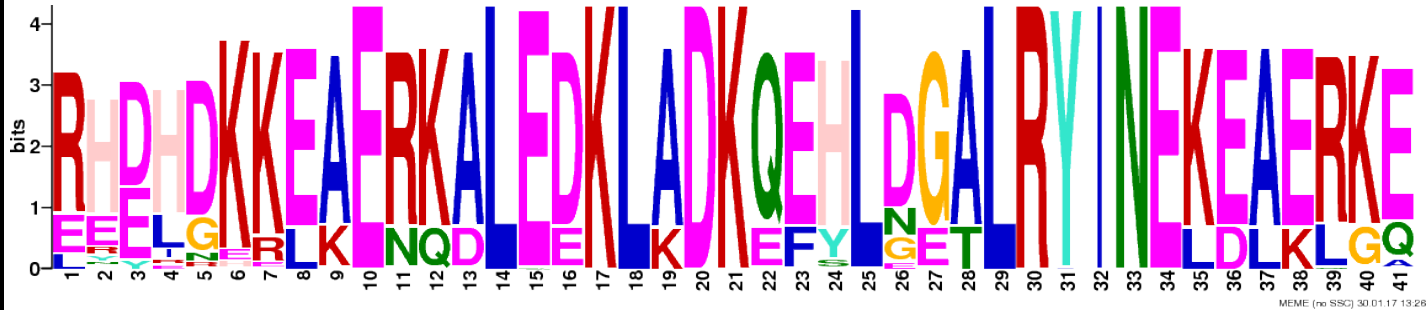

m08

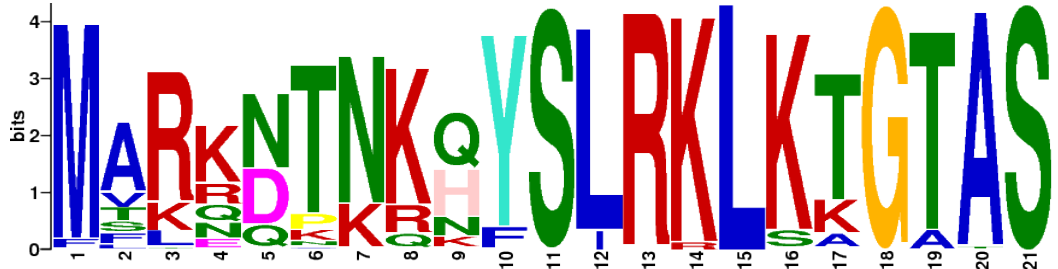

m09

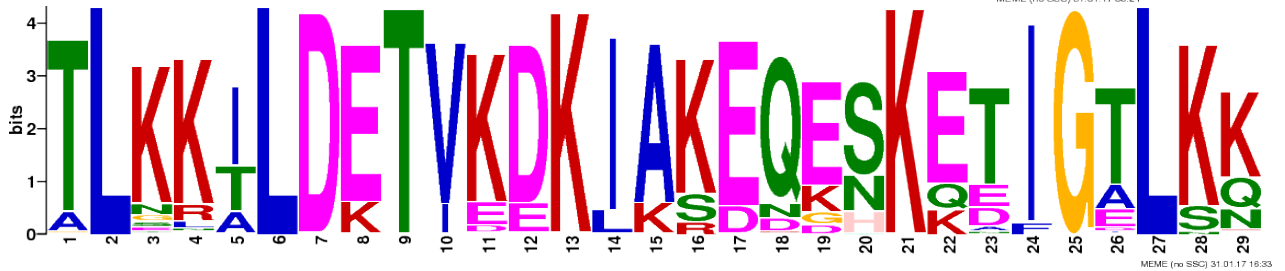

m10

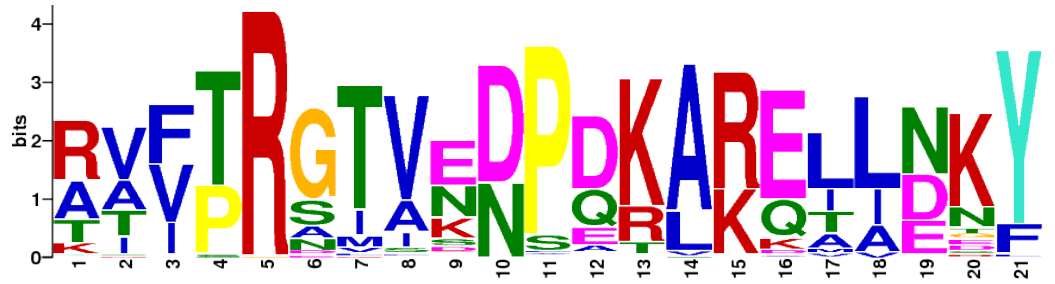

m11

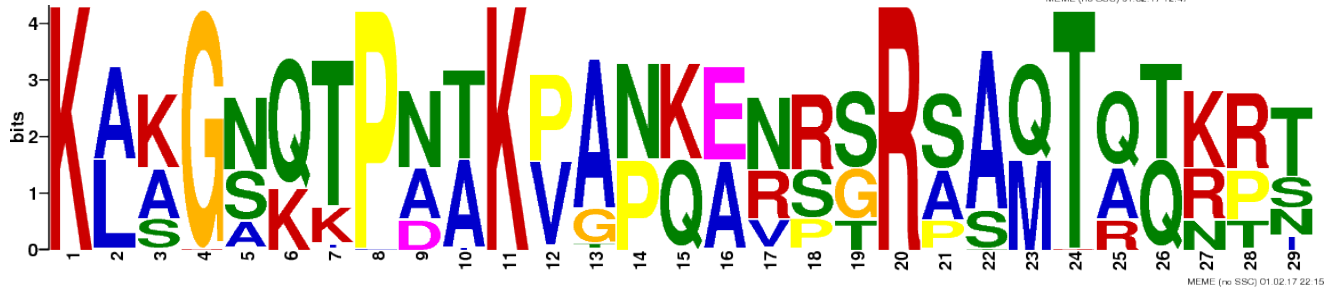

m12

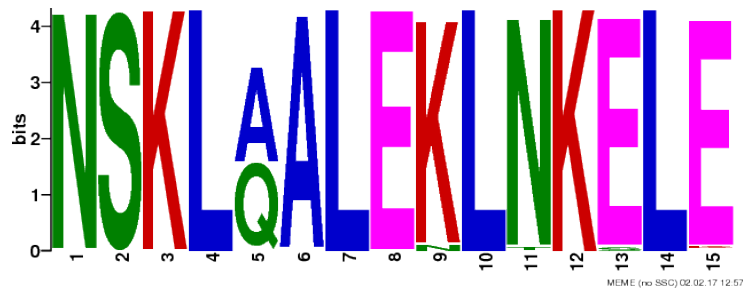

Motif

Logo

m13

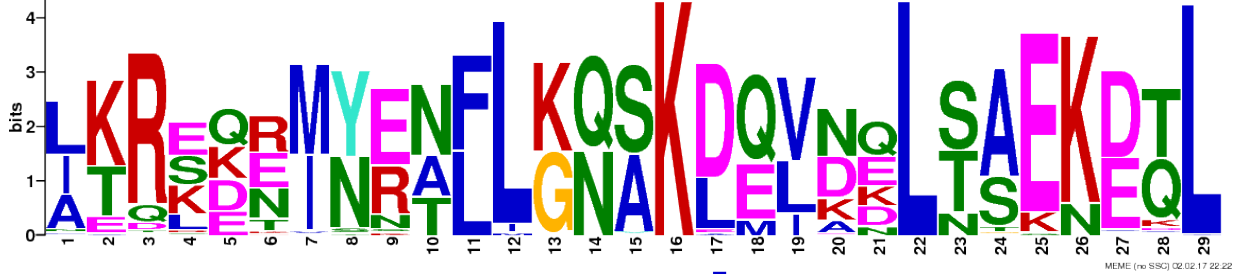

m14

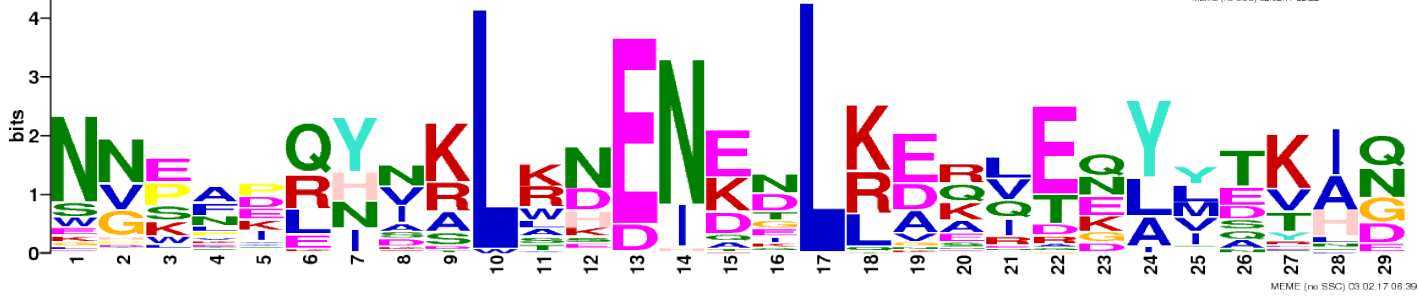

m15

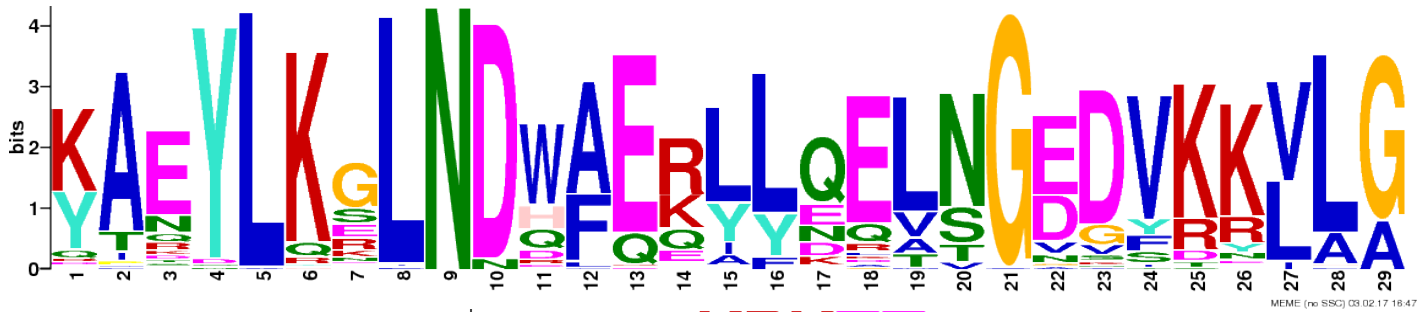

m16

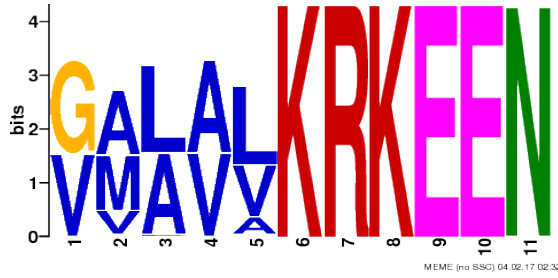

m17

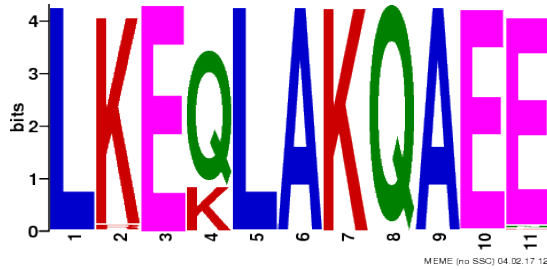

m18

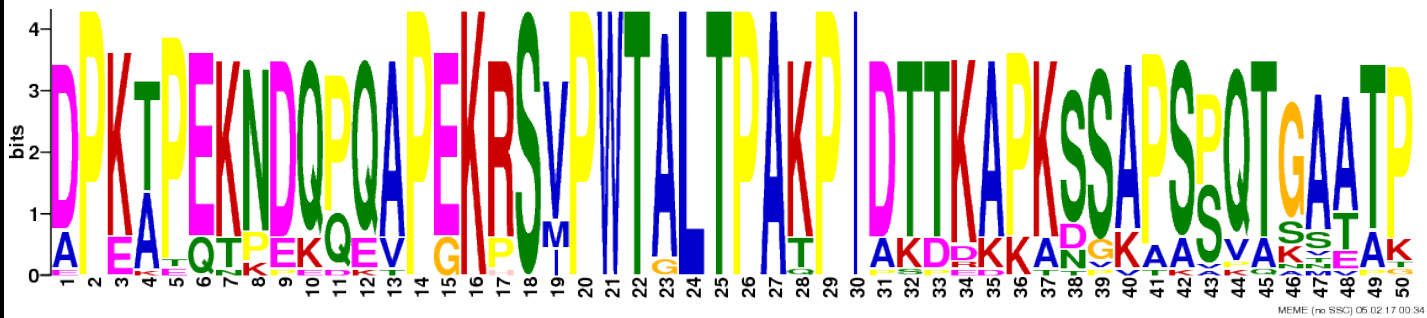

Motif

Logo

m19

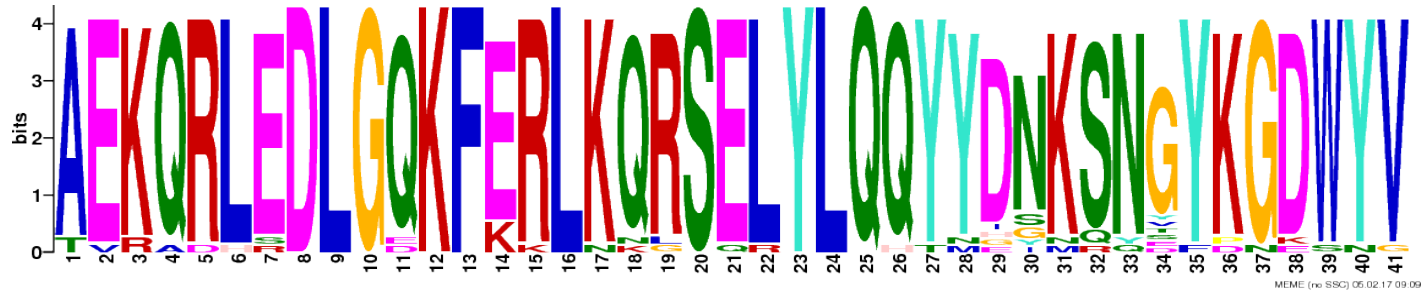

m20

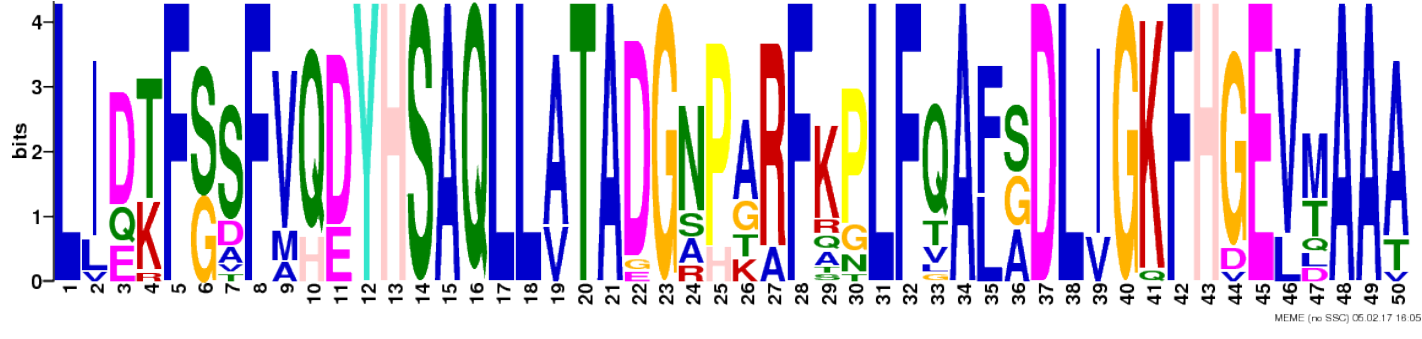

Supplement: 12859_2019_2686_MOESM1_ESM.pdf [file 12859_2019_2686_MOESM1_ESM.pdf]
